# Supplementary material for: Roles of the Two-MnSOD System of Stenotrophomonas maltophilia in the Alleviation of Superoxide Stress
Source: PubMed Central journal article supplement (PMC6479884; doi:10.3390/ijms20071770), 2019-04-10
Supplement: ijms-20-01770-s001.pdf [file ijms-20-01770-s001.pdf]

**Table 1.** Bacterial strains, plasmids and primers used in this study.

| Strain, plasmid, or primer     | Genotype or properties                                                                                                                                                        | Reference  |
|--------------------------------|-------------------------------------------------------------------------------------------------------------------------------------------------------------------------------|------------|
| <b><i>S. maltophilia</i></b>   |                                                                                                                                                                               |            |
| KJ                             | Wild type, a clinical isolate from Taiwan                                                                                                                                     | 1          |
| KJ A1                          | <i>S. maltophilia</i> KJ <i>sodA1</i> mutant; <i>sodA1</i>                                                                                                                    | This study |
| KJ A2                          | <i>S. maltophilia</i> KJ <i>sodA2</i> mutant; <i>sodA2</i>                                                                                                                    | This study |
| KJ B                           | <i>S. maltophilia</i> KJ <i>sodB</i> mutant; <i>sodB</i>                                                                                                                      | This study |
| KJ A1ΔB                        | <i>S. maltophilia</i> KJ <i>sodA1</i> and <i>sodB</i> double mutant; <i>sodA1</i> , <i>sodB</i>                                                                               | This study |
| KJ A2ΔB                        | <i>S. maltophilia</i> KJ <i>sodA2</i> and <i>sodB</i> double mutant; <i>sodA2</i> , <i>sodB</i>                                                                               | This study |
| KJ A1 A2                       | <i>S. maltophilia</i> KJ <i>sodA1</i> and <i>sodA2</i> double mutant; <i>sodA1</i> , <i>sodA2</i>                                                                             | This study |
| KJ A1ΔA2ΔB                     | <i>S. maltophilia</i> KJ <i>sodA1</i> , <i>sodA2</i> , and <i>sodB</i> triple mutant; <i>sodA1</i> , <i>sodA2</i> , <i>sodB</i>                                               | This study |
| KJΔSoxR                        | <i>S. maltophilia</i> KJ <i>soxR</i> mutant; <i>soxR</i>                                                                                                                      | 2          |
| KJΔOxyR                        | <i>S. maltophilia</i> KJ <i>oxyR</i> mutant; <i>oxyR</i>                                                                                                                      | 2          |
| <b><i>Escherichia coli</i></b> |                                                                                                                                                                               |            |
| DH5α                           | F- φ80dlacZΔM15 Δ( <i>lacZYA-argF</i> )U169 <i>deoR recA1 endA1 hsdR17</i> (r <sub>K</sub> m <sub>K</sub> <sup>+</sup> ) <i>phoA supE44 λ thi-1 gyrA96 relA1</i>              | Invitrogen |
| S17-1                          | λ pir + mating strain                                                                                                                                                         | 3          |
| <b>Plasmids</b>                |                                                                                                                                                                               |            |
| pEX18Tc                        | <i>sacB oriT</i> , Tc <sup>r</sup>                                                                                                                                            | 4          |
| pRK415                         | Broad host range expression vector, Tc <sup>r</sup>                                                                                                                           | 5          |
| pRKXylE                        | Plasmid pRK415 containing a <i>xylE</i> cassette and the orientation of <i>xylE</i> gene being opposite to the orientation of <i>lacZ</i> promoter of pRK415; Tc <sup>r</sup> | 1          |
| p SodA1                        | pEX18Tc with an internal deletion <i>sodA1</i> gene; Tc <sup>r</sup>                                                                                                          | This study |
| pΔSodA2                        | pEX18Tc with an internal deletion <i>sodA2</i> gene; Tc <sup>r</sup>                                                                                                          | This study |
| pΔSodB                         | pEX18Tc with an internal deletion <i>sodB</i> gene; Tc <sup>r</sup>                                                                                                           | This study |
| pSodA1 <sub>xylE</sub>         | pRK415 with a <i>P<sub>sodA1</sub>-xylE</i> promoter transcriptional fusion; Tc <sup>r</sup>                                                                                  | This study |
| pSodA2 <sub>xylE</sub>         | pRK415 with a <i>P<sub>sodA2</sub>-xylE</i> promoter transcriptional fusion; Tc <sup>r</sup>                                                                                  | This study |
| pSodB <sub>xylE</sub>          | pRK415 with a <i>P<sub>sodB</sub>-xylE</i> promoter transcriptional fusion; Tc <sup>r</sup>                                                                                   | This study |
| <b>Primers</b>                 |                                                                                                                                                                               |            |
| SodA1N-F                       | 5'- GGGAGCTCAGTTGAAGGCGTGGA -3'                                                                                                                                               | This study |
| SodA1N-R                       | 5'- GCTCTAGAAGCGAGTACGACAT -3'                                                                                                                                                | This study |
| SodA1C-F                       | 5'- GATTCTAGAAGCTGGATGTCTGGGA -3'                                                                                                                                             | This study |
| SodA1C-R                       | 5'- CGCGCATGCGGATCGGCAAA -3'                                                                                                                                                  | This study |
| SodA2N-F                       | 5'- GCGGTACCTGCTGTTTCGCGGTTA -3'                                                                                                                                              | This study |
| SodA2N-R                       | 5'- CATCTAGAGCAGGGTATAGGCCA -3'                                                                                                                                               | This study |
| SodA2C-F                       | 5'- CGTTCTAGAACGTCATCGACTGGA -3'                                                                                                                                              | This study |
| SodA2C-R                       | 5'- ACCGTCGACCTGATGACCTGGAT -3'                                                                                                                                               | This study |
| SodBN-F                        | 5'-GGGAGCTCGGCAGGTTGGAGA-3'                                                                                                                                                   | This study |
| SodBN-R                        | 5'-GAAAGCTTCCACGTAGGCGCGA-3'                                                                                                                                                  | This study |
| SodBC-F                        | 5'-GGGAGCTCGGCAGGTTGGAGA-3'                                                                                                                                                   | This study |

|           |                                |            |
|-----------|--------------------------------|------------|
| SodBC-R   | 5'-CAGGTCGACCACCTCGATGCGA-3'   | This study |
| SodA1Q-F  | 5'- TACTCGCTTCCCCGCTCCC -3'    | This study |
| SodA1Q-R  | 5'- GCTGAGCACGGTCCAGAACAGG -3' | This study |
| SodA2Q-F  | 5'- CCTACGCCTACGACGCGCTG -3'   | This study |
| SodA2Q-R  | 5'- CACGTCGCCACCGGGTTAC -3'    | This study |
| SodBQ-F   | 5'- TGCCTGCCCTGCCCTACCTTTC -3' | This study |
| SodBQ-R   | 5'- TCGCCGAAGTGGCGCTTAC -3'    | This study |
| 16S DNA-F | 5'- GACCTTGCGCGATTGAATG -3'    | 6          |
| 16S DNA-R | 5'- CGGATCGTCGCCTTGGT -3'      | 6          |

## References

1. Hu, R.M.; Huang, K.J.; Wu, L.T.; Hsiao, Y.J.; Yang, T.C. Induction of L1 and L2  $\beta$ -lactamases of *Stenotrophomonas maltophilia*. *Antimicrob. Agents Chemother.* **2008**, *52*, 1198–1200.
2. Wu, C.J.; Chiu, T.T.; Lin, Y.T.; Huang, Y.W.; Yang, T.C. Role of *smeU1VWU2X* operon in the alleviation of oxidative stresses and the occurrence of sulfamethoxazole/trimethoprim-resistant mutants in *Stenotrophomonas maltophilia*. *Antimicrob. Agents Chemother.* **2018**, *62*, e02114-17.
3. Simon, R.; O'Connell, M.; Labes, M.; Puhler, A. Plasmid vector for the genetic analysis and manipulation of *Rhizobia* and other Gram-negative bacteria. *Methods Enzymol* **1986**, *118*, 640-659.
4. Hoang, T.T.; Karkhoff-Schweizer, R.R.; Kutchma, A.J.; Schweizer, H.P. A broad-host-range Flp-FRT recombination system for site-specific excision of chromosomally-located DNA sequences: application for isolation of unmarked *Pseudomonas aeruginosa* mutants. *Gene* **1998**, *212*, 77-86.
5. Keen, N.T.; Tamaki, S.; Kobayashi, D.; Trollinger, D. Improved broad-host-range plasmids for DNA cloning in gram-negative bacteria. *Gene* **1988**, *70*, 191-197.
6. Chen, C.H.; Huang, C.C.; Chung, T.C.; Hu, R.M.; Huang, Y.W.; Yang, T.C. Contribution of resistance-nodulation-division efflux pump operon *smeU1-V-W-U2-X* to multidrug resistance of *Stenotrophomonas maltophilia*. *Antimicrob. Agents Chemother.* **2011**, *55*, 5826-5833.
